# Supplementary material
Source: PubMed Central journal article supplement (PMC3988759)
Supplement: 10.3163.1536-5050.102.2.010.sg001.pdf [file 10.3163.1536-5050.102.2.010.sg001.pdf]

## Pharmacy journal abstracts published in PubMed that abide by CONSORT guidelines

Daniel A. Blair, PharmD; Peter J. Hughes, PharmD; Thomas W. Woolley Jr., PhD

### APPENDIX

#### Search strategy

("Pharmacotherapy"[Journal] OR "Journal of the American Pharmacists Association: JAPhA"[Journal] OR "The Annals of Pharmacotherapy"[Journal] OR "American Journal of Health-System Pharmacy: AJHP: official journal of the American Society of Health-System Pharmacists"[Journal] OR "The Consultant Pharmacist: the Journal of the American Society of Consultant Pharmacists"[Journal] AND Randomized Controlled Trial[Publication Type]) AND ("2009/01/01"[PDAT] : "2011/12/31"[PDAT])

To ensure completeness, additional searches were performed to identify more abstracts eligible for inclusion:

("Pharmacotherapy"[Journal]) AND "Randomized Controlled Trial"[Publication Type] AND ("2009/01/01"[PDat] : "2011/12/31"[PDat]); ("Journal of the American Pharmacists Association: JAPhA "[Journal]) AND "Randomized Controlled Trial"[Publication Type] AND ("2009/01/01"[PDat] : "2011/12/31"[PDat]); ("The Annals of Pharmacotherapy "[Journal]) AND "Randomized Controlled Trial"[Publication Type] AND ("2009/01/01"[PDat] : "2011/12/31"[PDat]) ("American Journal of Health-System Pharmacy: AJHP : Official journal of the American Society of Health-System Pharmacists "[Journal]) AND "Randomized Controlled Trial"[Publication Type] AND ("2009/01/01"[PDat] : "2011/12/31"[PDat]); ("The Consultant Pharmacist "[Journal]) AND "Randomized Controlled Trial"[Publication Type] AND ("2009/01/01"[PDat] : "2011/12/31"[PDat])
